# Supplementary material for: Direct observation of liquid pre-crystallization intermediates during the reduction of aqueous tetrachloroaurate by sulfide ions
Source: Royal Society of Chemistry journal article supplement (doi:10.1039/c3cp54583k), 2014-01-01
Supplement: c3cp54583k.pdf [file c3cp54583k.pdf]

## Electronic Supplementary Information

### Direct observation of liquid pre-crystallization intermediates during the reduction of aqueous tetrachloroaurate by sulfide ions

Yuri Mikhlin<sup>\*a</sup>, Anton Karacharov<sup>a</sup>, Maxim Likhatski<sup>a</sup>, Tatyana Podlipskaya<sup>b</sup>, Ivo Zizak<sup>c</sup>

<sup>a</sup> Institute of Chemistry and Chemical Technology of Siberian Branch of Russian academy of sciences, Akademgorodok, 50/24, Krasnoyarsk, 660036, Russia

<sup>b</sup> Nikolayev Institute of Inorganic Chemistry SB RAS, Lavrent'ev av., 3, Novosibirsk, 630090, Russia

<sup>c</sup> Helmholtz-Zentrum Berlin für Materialien und Energie GmbH, Albert-Einstein-Strasse 15, D-12489 Berlin, Germany

\*corresponding author, E-mail: yumikh@icct.ru

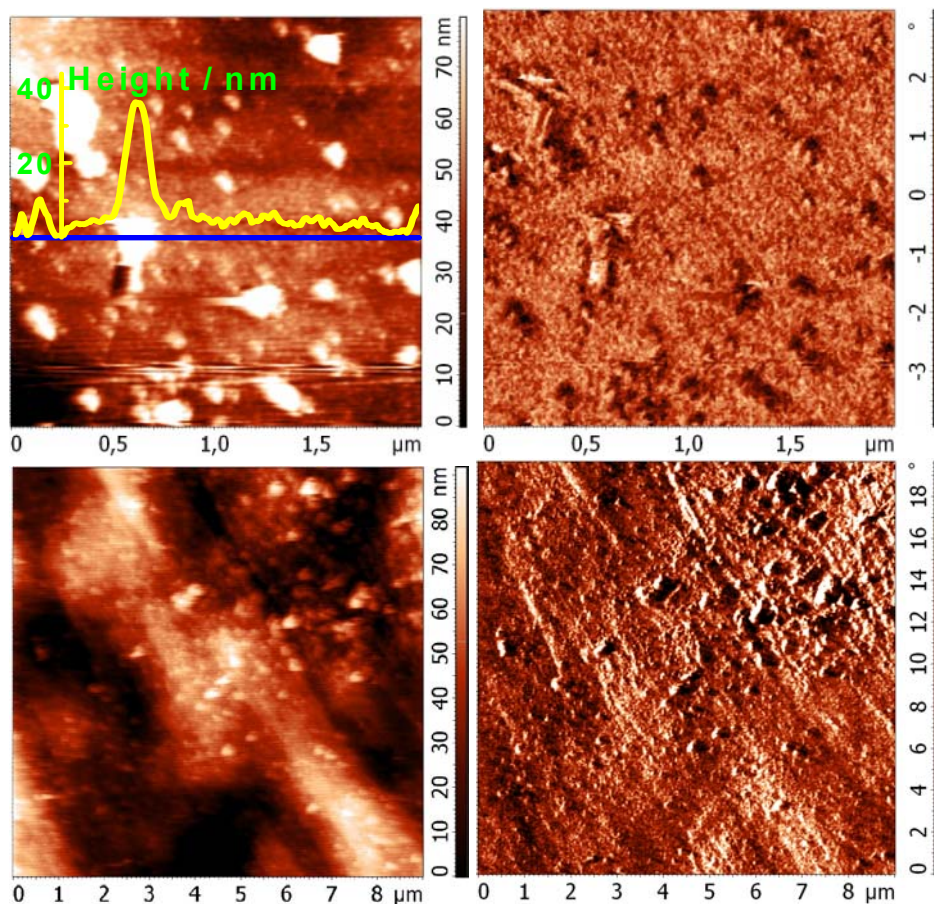

**Fig. S1** *In situ* tapping-mode AFM height (left panel) and phase images of the products formed with  $\text{Na}_2\text{S}/\text{AuCl}_4^-$  ratio of 3 and condensed on HOPG support acquired in about 15 min (upper panels) and about 2 h after mixing the reactants.

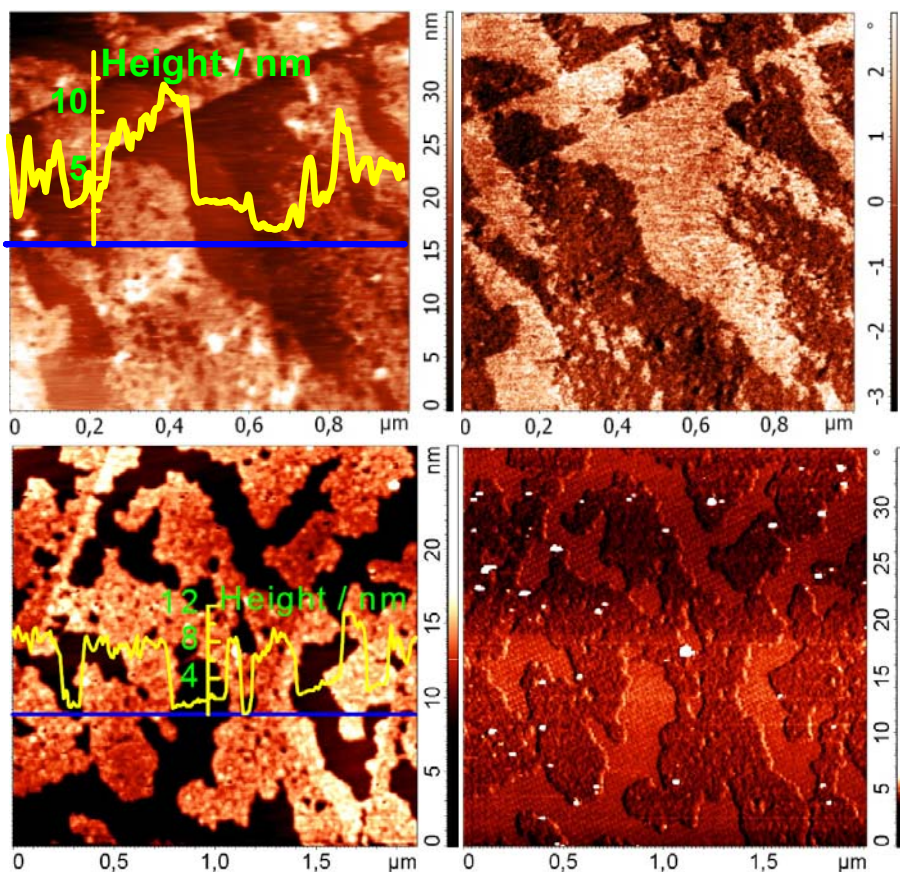

**Fig. S2** Tapping-mode AFM height (left) and phase images acquired *in situ* at HOPG areas free from large droplets after 90 min reaction with  $\text{Na}_2\text{S}/\text{AuCl}_4^-$  ratio of 3 (upper panels) and *ex situ* from the products dried in air (lower panels).

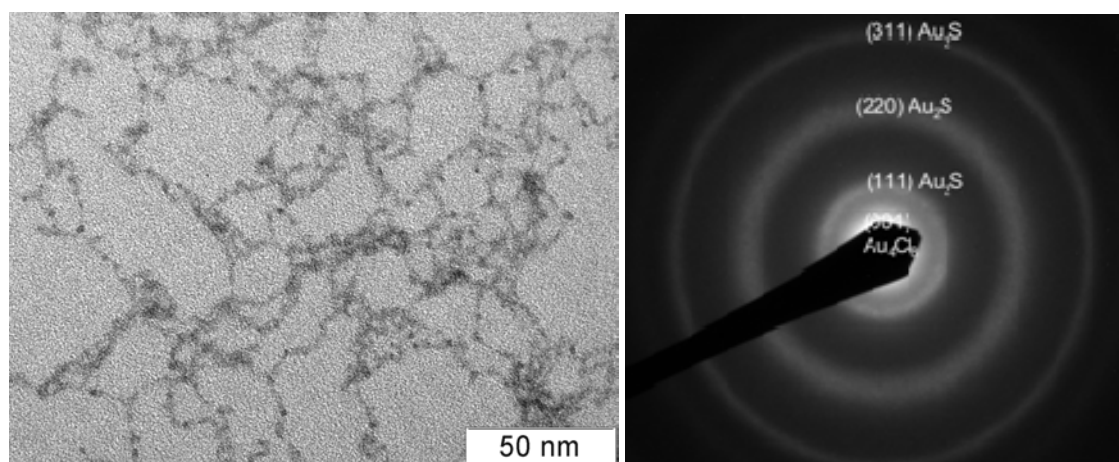

**Fig. S3** Typical TEM image and electron diffraction pattern of the products afforded with  $\text{Na}_2\text{S}/\text{AuCl}_4^-$  ratio of 3.

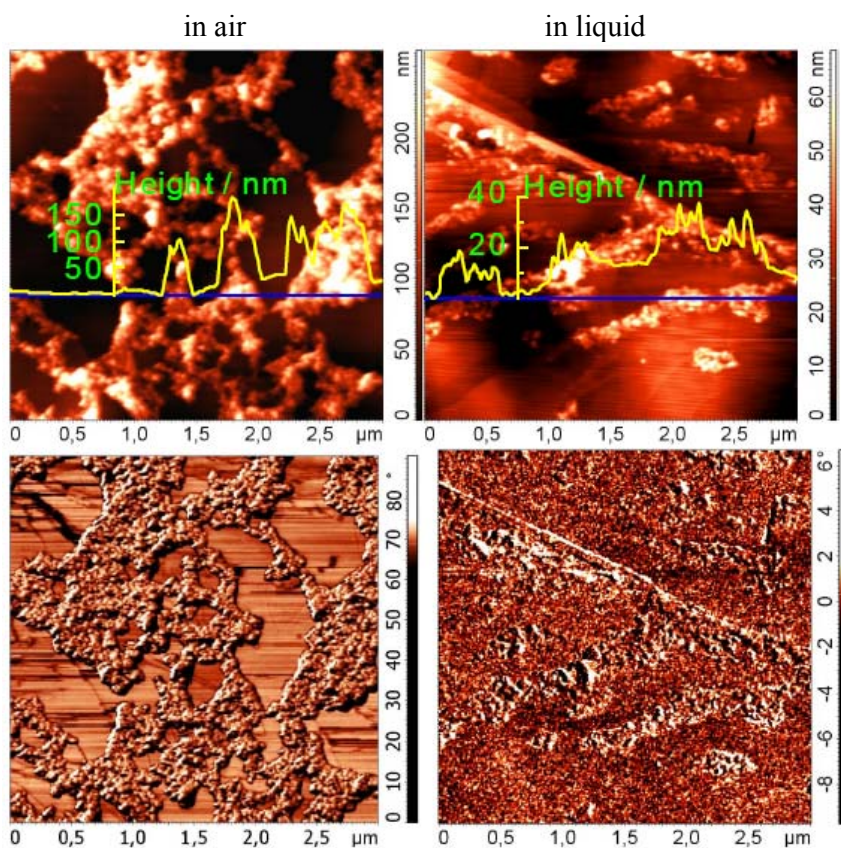

**Fig. S4** *Ex situ* (left) and *in situ* (right panels) tapping-mode AFM height and phase (lower panels) images of the products formed with  $\text{Na}_2\text{S}/\text{AuCl}_4^-$  ratio of 1.8 on HOPG support.

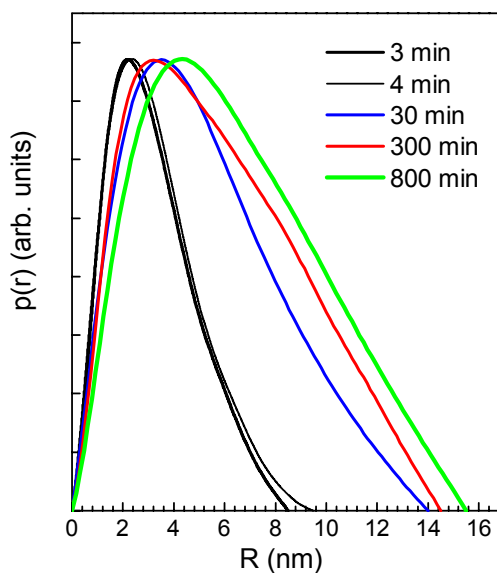

**Fig. S5** Distance distribution functions determined from SAXS data for solutions with  $\text{Na}_2\text{S}/\text{AuCl}_4^-$  ratio of 3 for various reaction times.

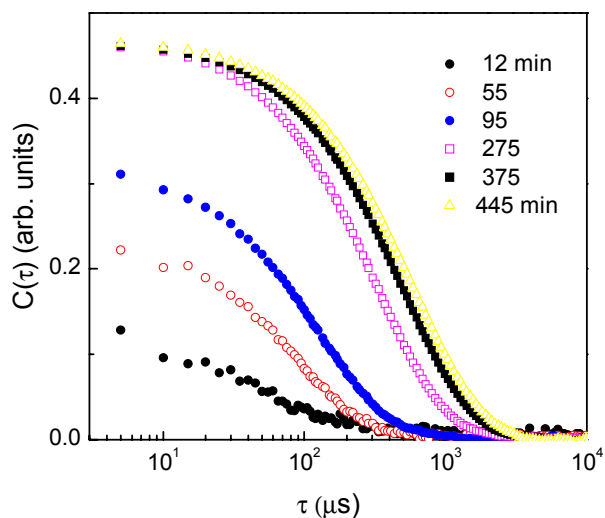

**Fig. S6** Typical autocorrelation functions of dynamic light scattering measured in the medium with  $\text{Na}_2\text{S}/\text{AuCl}_4^-$  ratio of 3 at different reaction times.

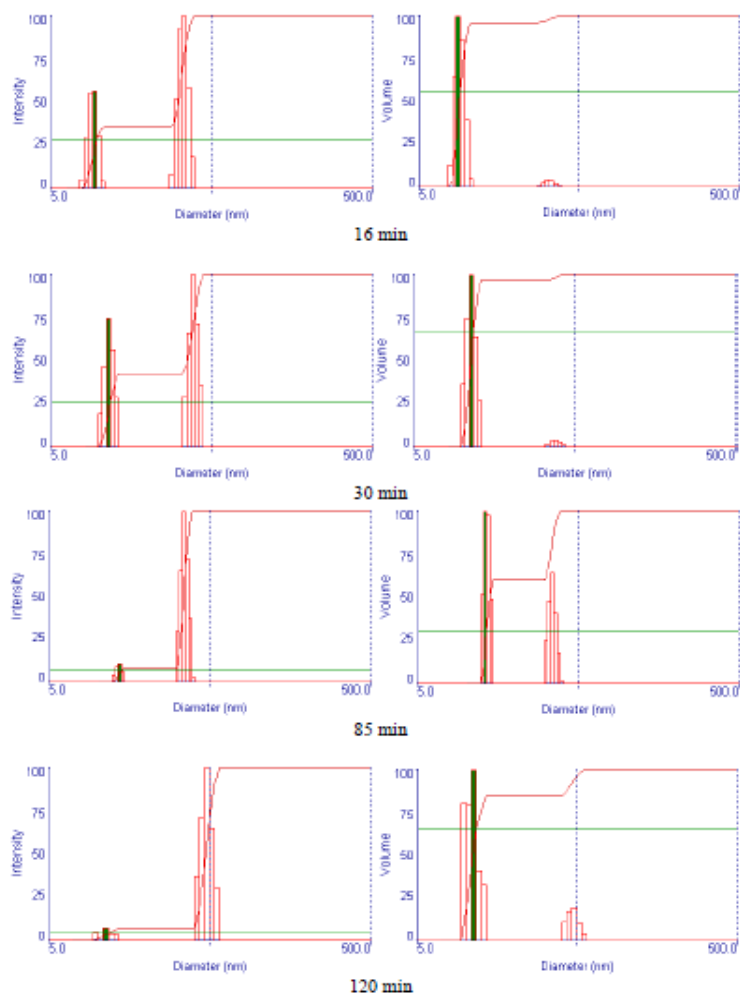

**Fig. S7** Particle size and relative volume distribution derived from dynamic light scattering measured in the medium with  $\text{Na}_2\text{S}/\text{AuCl}_4^-$  ratio of 3 at selected reaction times.
